# Supplementary material for: Efficient thiocyanate-free sensitizer: a viable alternative to N719 dye for dye-sensitized solar cells
Source: Royal Society of Chemistry journal article supplement (doi:10.1039/c2dt30697b), 2012-01-01
Supplement: c2dt30697b.pdf [file c2dt30697b.pdf]

*Electronics Supplementary Information*

## Efficient thiocyanate-free sensitizer: A viable alternative to N719 dye for dye-sensitized solar cells

Surya Prakash Singh,\*<sup>a</sup> K.S.V. Gupta,<sup>a</sup> G.D. Sharma,<sup>b</sup> Ashrafal Islam,<sup>c</sup> and Liyuan Han<sup>c</sup>

<sup>a</sup>Inorganic and Physical Chemistry Division, Indian Institute of Chemical Technology, Uppal Road, Tarnaka, Hyderabad, 500607, India, Fax: +91(0)40-2716-0921; Tel: +91(0)40-2719-3186, E-mail: [spsingh@iict.res.in](mailto:spsingh@iict.res.in)

<sup>b</sup>R & D centre for Engineering and Science, Jaipur Engineering College, Kukas, Jaipur (Raj.), India

<sup>c</sup>Photovoltaic Materials Unit, National Institute for Materials Science, 1-2-1 Sengen, Tsukuba, Ibaraki 305-0047, Japan.

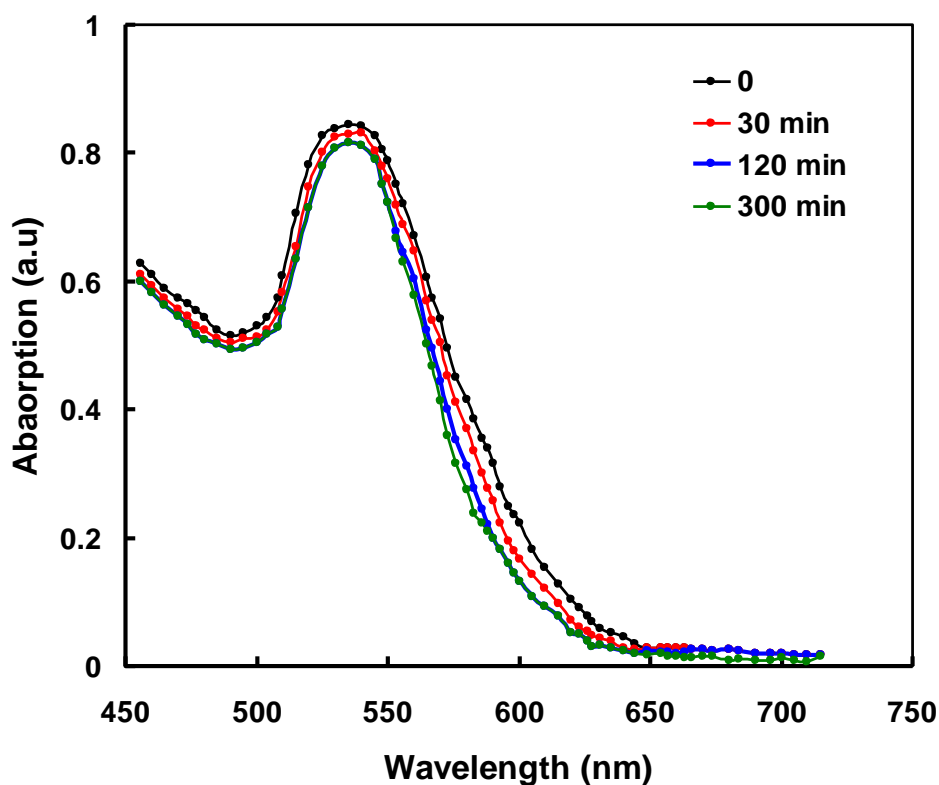

Fig. S1. Optical absorption spectra of the SPS-01 in solution at different time intervals
